# Supplementary material for: Safety Assessment of Compounds after In Vitro Metabolic Conversion Using Zebrafish Eleuthero Embryos
Source: MDPI journal article supplement (doi:10.3390/ijms20071712), 2019-04-06

# Supplementary Materials

**Figure S1.** Extracted ion chromatograms of non-activated (a) and activated sample (b) of parathion. Parathion is present in both the non-activated and activated samples with a mass-to-charge ratio ( $m/z$ ) of 292 corresponding to the molecular weight of parathion (291), as verified with a reference standard. Paraoxon is present in the activated sample with an  $m/z = 276$  corresponding to molecular weight of paraoxon (275) (mass spectra were recorded in positive ESI mode).

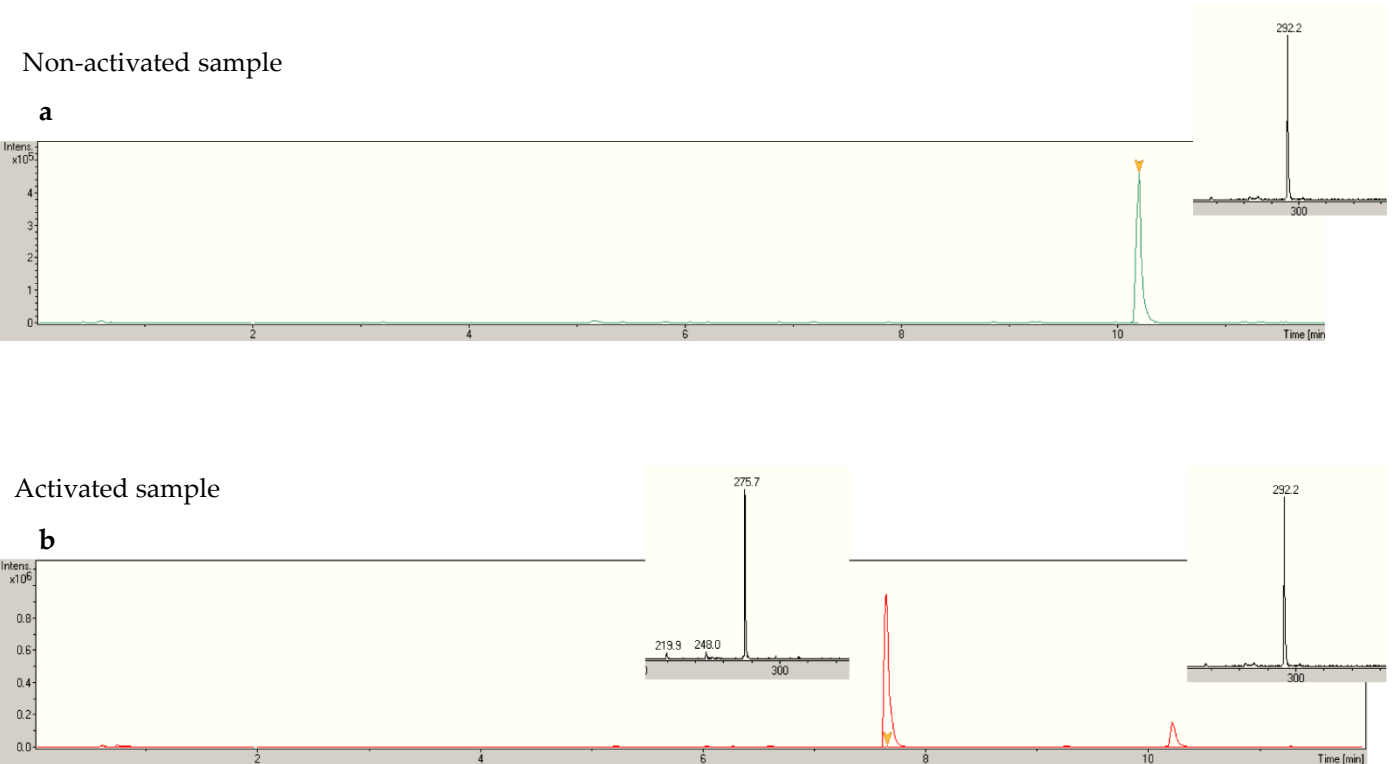

**Figure S2.** Extracted ion chromatograms of non-activated (a) and activated sample (b) of malathion. In both the non-activated and activated samples there is a peak with a mass-to-charge ratio ( $m/z$ ) of 303 corresponding to the molecular weight of MMA (301) (mass spectra were recorded in positive ESI mode). No reference standard of MMA was available, so its identification is only tentative.

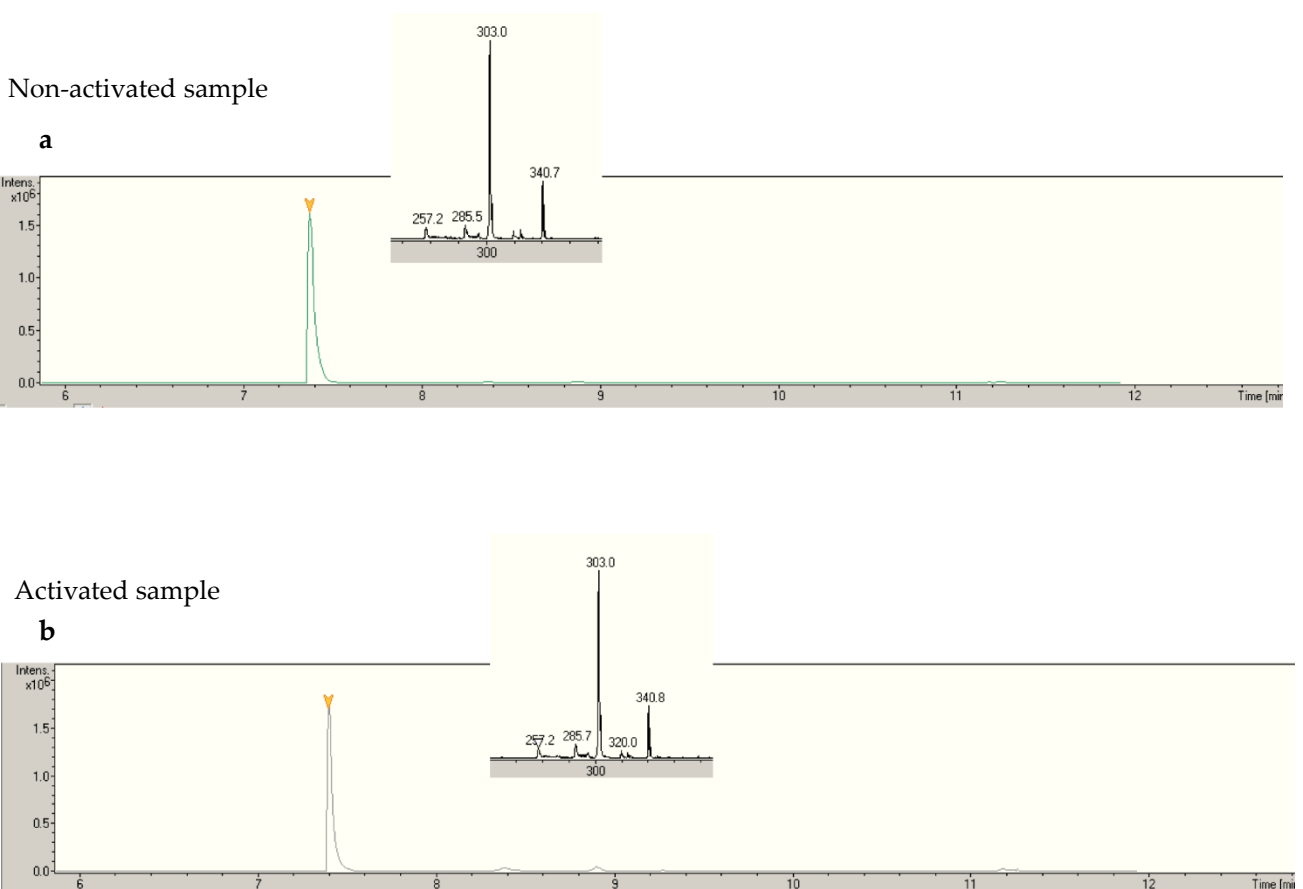

**Figure S3.** LC-UV chromatogram of non-activated (a) and activated sample (b) of chloramphenicol. In both the non-activated and activated samples there is a peak with an elution time of 5.6 corresponding to chloramphenicol (as verified with a reference standard).

Non-activated sample

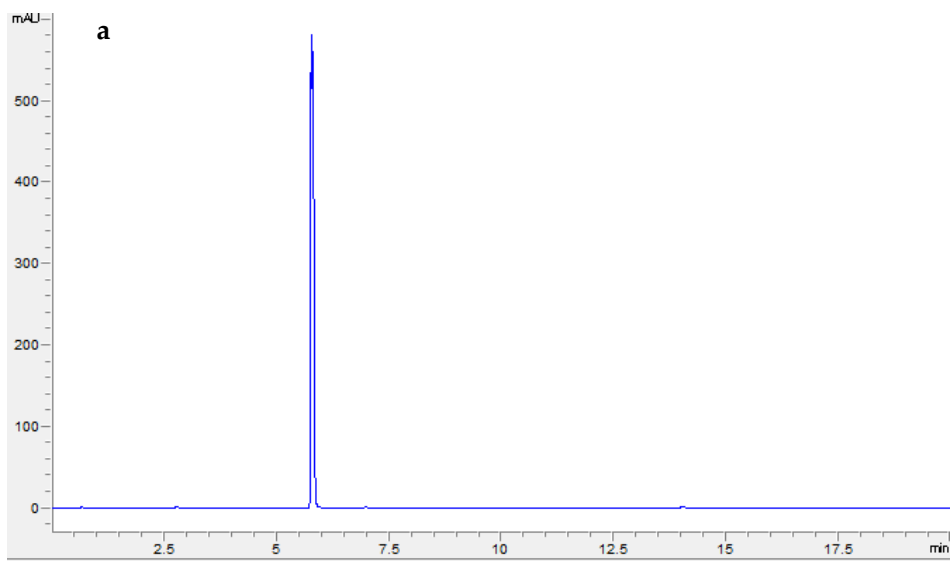

Activated sample

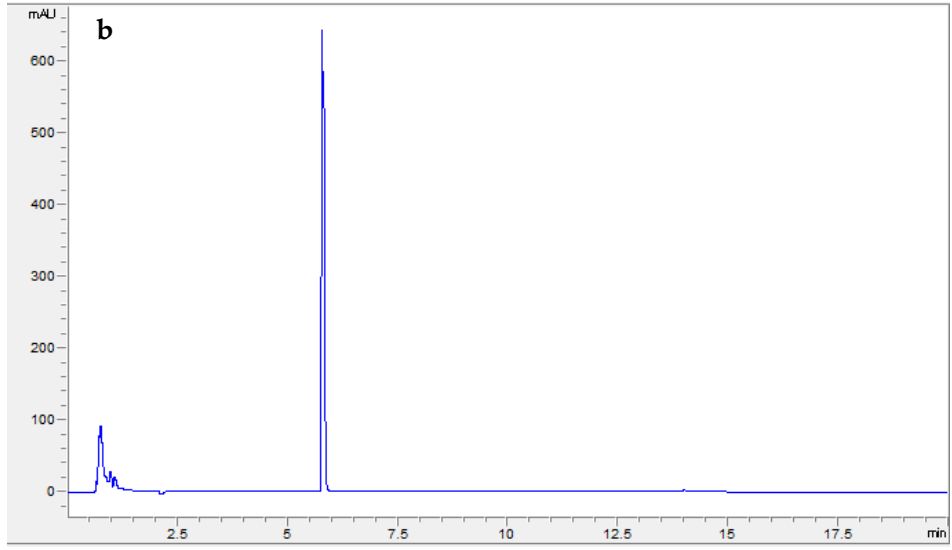

Supplement: s1 [file s1]
